# Supplementary material for: Local time extent of magnetopause reconnection using space–ground coordination
Source: Copernicus journal article supplement (doi:10.5194/angeo-37-215-2019), 2019-04-10
Supplement: Supplementary file 1 [file angeo-37-215-2019-supplement.pdf]

Supplement of Ann. Geophys., 37, 215–234, 2019  
<https://doi.org/10.5194/angeo-37-215-2019-supplement>  
© Author(s) 2019. This work is distributed under  
the Creative Commons Attribution 4.0 License.

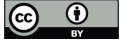

*Supplement of*

## **Local time extent of magnetopause reconnection using space–ground coordination**

**Ying Zou et al.**

*Correspondence to:* Ying Zou (yingzou@bu.edu)

The copyright of individual parts of the supplement might differ from the CC BY 4.0 License.

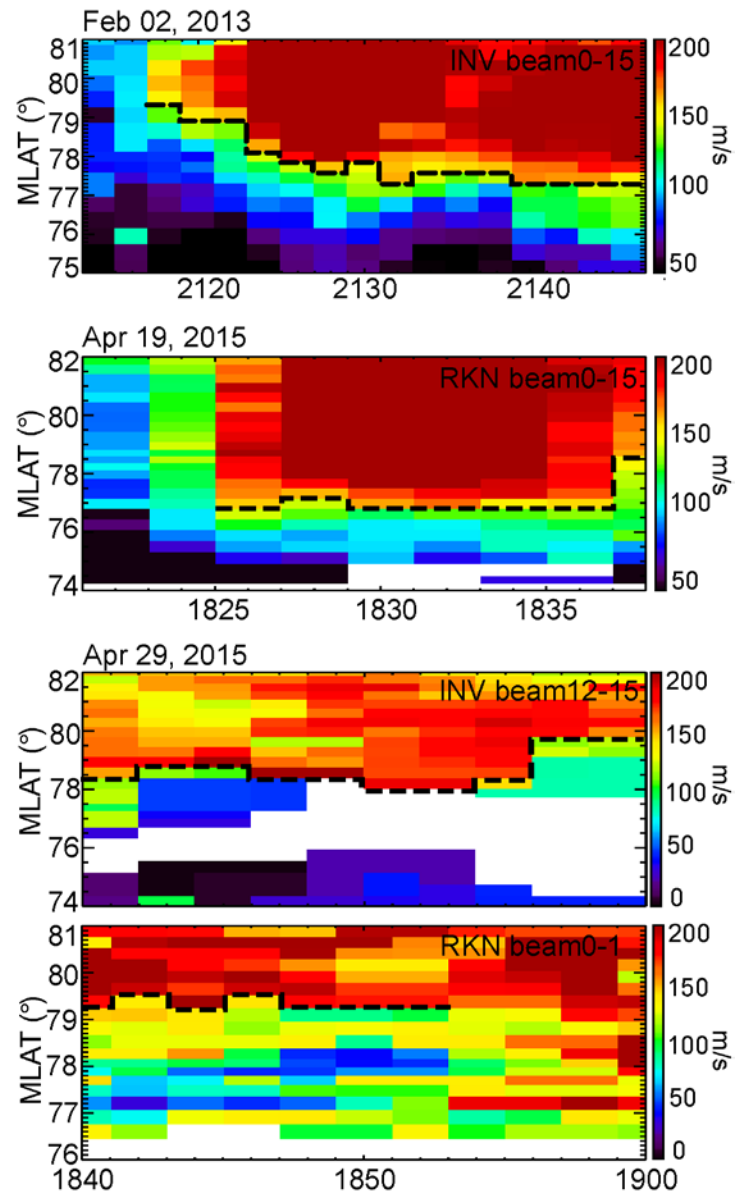

Figure S1. Location of the open-closed field line boundary (marked by the black dashed line) in the three studied events. The open-closed field line boundary is determined based on the spectral width measurements following the method given by Chisham and Freeman [2003, 2004] and Chisham et al. [2004b, 2005a, 2005b, 2005c].

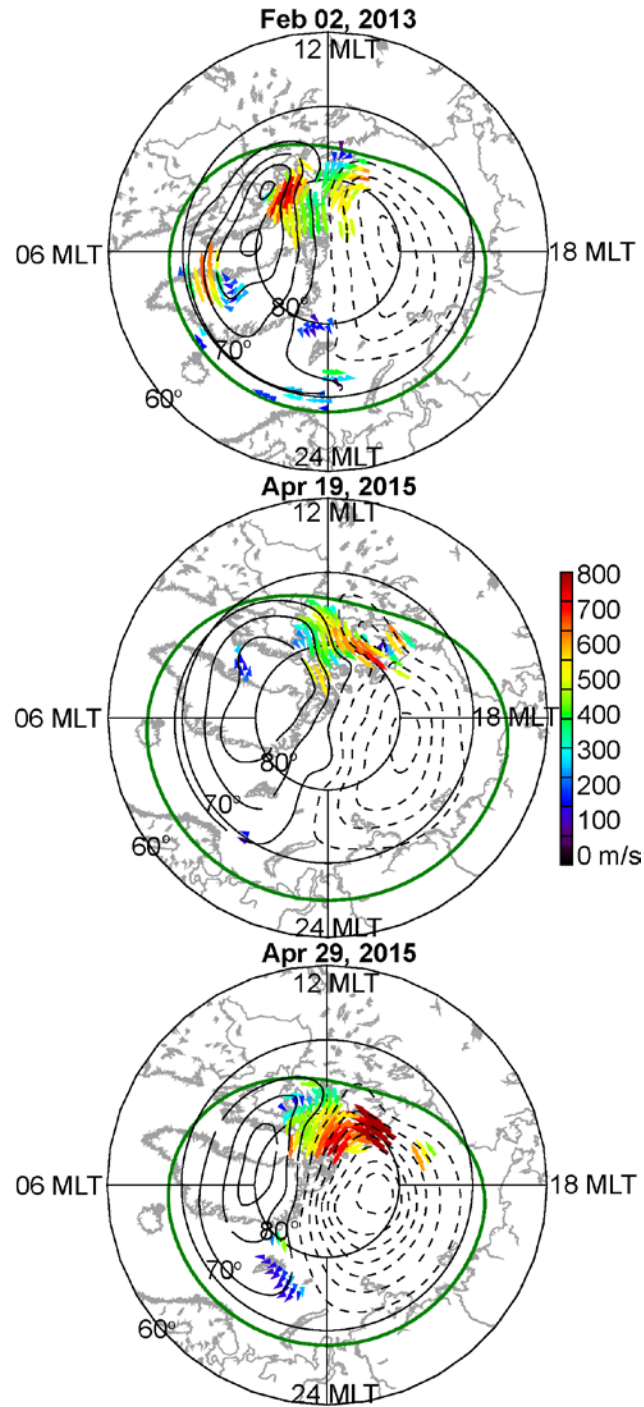

Figure S2. Global convection maps of the three studied events. The SHF velocities are shown as color arrows, and the contours of the electric potential are shown as black solid (at the duskside) and dashed lines (at the dawnside). The green curve denotes Heppner-Maynard boundary [Heppner and Maynard, 1987].
